# Supplementary material for: The rate and extent of wind-gap migration regulated by tributary confluences and avulsions
Source: Copernicus journal article supplement (doi:10.5194/esurf-9-687-2021), 2021-07-07
Supplement: Supplementary file 1 [file esurf-9-687-2021-supplement.pdf]

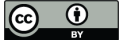

*Supplement of*

## **The rate and extent of wind-gap migration regulated by tributary confluences and avulsions**

**Eitan Shelef and Liran Goren**

*Correspondence to:* Eitan Shelef (shelef@pitt.edu)

The copyright of individual parts of the supplement might differ from the article licence.

# 1 Content

2 This file contains: (1) a description of automated procedure to approximate windgap locations, (2)  
3 a description of the procedure to compute energy dissipation in Figure 8 of the main manuscript,  
4 and (3) a figure showing the influence of the exponent  $n$  on windgap migration.

## 5 Automated procedure to approximate windgap locations

6 Windgaps locations were identified over GMTED DEMs (Danielson and Gesch, 2011) by delineating  
7 the drainage divides associated with a channel network mapped with drainage area thresholds of 200  
8 and 12.5 km<sup>2</sup> for the Himalayas and Appalachia, respectively (values hereafter are reported in the  
9 same order for these two areas). To identify major divides at relatively low topographic positions  
10 (i.e., windgaps) we isolated high order divides (Scherler and Schwanghart, 2019), computed the  
11 local relief based on divide elevations within a radius of 30 and 5 km, respectively, and identified  
12 locations of minimal divide elevation within these radii. These radii are based on typical valley  
13 widths in these areas and are similar to the typical distance from divide to channel head based  
14 on the drainage area threshold that was used to define channels (scaled to distance via Hack's  
15 law). Of the locations of minimal divide elevation, we identified windgaps as locations with low  
16 along-valley-relief and high across valley relief. This was achieved by isolating locations of local  
17 divide relief that is higher than 200 and 100 m, respectively (i.e., common reliefs for valleys in these  
18 areas), and a vertical elevation difference between the divide and closest streams (on each side of  
19 the divide) that is less than 20% of the local divide relief. Note that this approach identifies only  
20 a subset of windgap locations as it depends on the predefined radii, relief, and order of divides.

## 21 Calculation of energy dissipation

22 Energy dissipation ( $P$ ) was computed, following Sun et al. (1994a,b), as  $P \propto \sum_i^N A_i^{1-m/n} \delta x$ , where  
23  $A_i$  is drainage area of the  $i$ 'th model node, and  $\delta x$  is the distance between nodes.  $N$  is the number of  
24 nodes in the simulation, excluding the hillslope nodes close to the windgap (defined by their convex  
25 topography). Note that this approach computes the energy content of a steady state topography  
26 associated with a given distribution of drainage area.

27 **The effect of varying the slope exponent  $n$  on simulated windgap**  
 28 **migration**

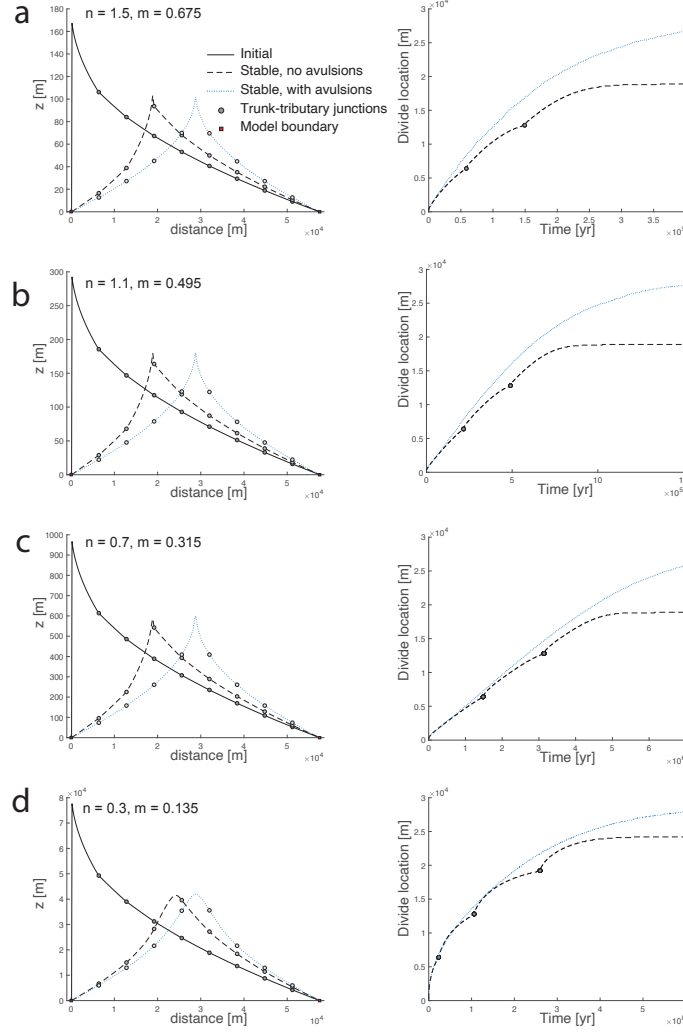

Figure S1: Windgap dynamics for simulations with different values of the exponents  $n$  and  $m$  where  $m/n = 0.45$  in all simulations. (a)-(d) The left panels show an initial and simulated topographic profiles along the trunk channel with and without avulsions, similar to Figure 5b in the main manuscript. The right panels show simulated windgap location vs. time for the same simulations, similar to figure 5c in the main manuscript. All model parameters, except for  $m$  and  $n$  are the same as in figure 5 in the main manuscript. Note that the pattern of response remains the same, whereas the timescale and topographic details change. In panel d ( $n = 0.3$ ), in the constant confluence (no avulsion) simulation, the windgap traverses three confluences before it attains a stable position, whereas for higher  $n$  values it traverses only two confluences. This is aligned with equation (2) in the main manuscript, where a lower  $n$  value increases the value of the LHS (note that we use the same  $D$  value for all simulations), thus destabilizing windgap locations that are stable with higher  $n$  values.

## 29 Bibliography

- 30 Danielson, J. J. and Gesch, D. B.: Global multi-resolution terrain elevation data 2010  
31 (GMTED2010), US Department of the Interior, US Geological Survey, 2011.
- 32 Scherler, D. and Schwanghart, W.: Identification and ordering of drainage divides in digital eleva-  
33 tion models, *Earth Surface Dynamics Discussion*, 2019, 14979, 2019.
- 34 Sun, T., Meakin, P., and Jøssang, T.: Minimum energy dissipation model for river basin geometry,  
35 *Physical Review E*, 49, 4865, 1994a.
- 36 Sun, T., Meakin, P., and Jøssang, T.: The topography of optimal drainage basins, *Water Resources*  
37 *Research*, 30, 2599–2610, 1994b.
